# Supplementary material for: Sickle cell disease in Grenada: Quality of life and barriers to care
Source: PubMed Central journal article supplement — Mol Genet Genomic Med. 2020 Dec 17;9(1):e1567. doi: 10.1002/mgg3.1567 (PMC7963427; doi:10.1002/mgg3.1567), 2020-12-17
Supplement: MGG3-9-e1567-s001.pdf [file MGG3-9-e1567-s001.pdf]

## Supplemental Data

### Sickle Cell Disease in Grenada: Quality of Life and Barriers to Care

Alyssa Grygiel<sup>1</sup>, Felicia Ikolo<sup>2</sup>, Raphielle Stephen<sup>2</sup>, Dawnell Bleasdille<sup>2</sup>, Patricia Robbins-Furman<sup>3</sup>, Beverly Nelson<sup>4</sup>, Andrew K Sobering<sup>2</sup>, Sarah H Elsea<sup>1,3</sup>

<sup>1</sup>School of Allied Health, Baylor College of Medicine, Houston, TX, USA; <sup>2</sup>Department of Biochemistry, St. George's University School of Medicine, St. George's, Grenada; <sup>3</sup>Department of Molecular and Human Genetics, Baylor College of Medicine, Houston, TX, USA; <sup>4</sup>Clinical Teaching Unit, St. George's University School of Medicine, St. George's, Grenada

#### **Contents**

**Table S1.** Barriers to Care survey scores of adults with SCD analyzed by demographic variables

**Table S2.** Barriers to Care survey scores of SCD caregiver participants analyzed by demographic variables

**Table S3.** ASCQ-ME survey scores analyzed by demographic variables

**Table S4.** Correlations of SCD-related caregiver burden survey scores with demographic variables

**Table S5.** Correlations of Barriers to Care survey scores of adults with SCD with genetics of sickle cell disease knowledge questions

**Table S6.** Genetics of sickle cell disease knowledge questions analyzed by demographic variables of caregiver participants

**Table S7.** Barriers to Care survey scores of caregiver participants analyzed by genetics of sickle cell disease knowledge

**Table S1.** Barriers to Care survey scores of adults with SCD analyzed by demographic variables

| Variable                | Mean (SD)      |                |                 |                |             |             |
|-------------------------|----------------|----------------|-----------------|----------------|-------------|-------------|
|                         | Total          | Skills         | Marginalization | Expectations   | Knowledge   | Pragmatics  |
| <b>Age</b>              |                |                |                 |                |             |             |
| 18-34                   | 69.7 (12.2)    | 71.4 (13.9)    | 68.8 (20.7)     | 65.8 (15.9)    | 74.5 (20.4) | 69.9 (11.2) |
| 35+                     | 70.6 (10.5)    | 73.7 (7.4)     | 70.8 (14.2)     | 71.9 (17.4)    | 69.6 (18.9) | 66.7 (9.6)  |
|                         | p=0.87         | p=0.69         | p=0.82          | p=0.44         | p=0.62      | p=0.53      |
| <b>Sex</b>              |                |                |                 |                |             |             |
| Male                    | 78.6 (13.5)    | 81.25 (12.5)   | 81.8 (12.8)     | 75.7 (22.9)    | 77.5 (26.0) | 75 (14.2)   |
| Female                  | 66.9 (9.1)     | 69.0 (10.0)    | 65.1 (18.1)     | 65.3 (13.2)    | 71.0 (17.4) | 66.5 (8.4)  |
|                         | <b>*p=0.04</b> | <b>*p=0.04</b> | p=0.08          | p=0.23         | p=0.54      | p=0.12      |
| <b>Education</b>        |                |                |                 |                |             |             |
| Primary                 | 83.6 (12.8)    | 80.5 (14.1)    | 88.6 (8.7)      | 88.4 (12.8)    | 87.5 (25)   | 73.6 (17.3) |
| Secondary               | 68.2 (6.1)     | 71.1 (10.4)    | 69.3 (12.8)     | 61.2 (10.7)    | 70.3 (18.2) | 69.1 (9.0)  |
| College+                | 64.2 (9.6)     | 68.7 (11.3)    | 58.8 (19.5)     | 64.3 (15.0)    | 67.0 (15.6) | 65.5 (7.7)  |
|                         | <b>*p=0.01</b> | p=0.28         | <b>*p=0.02</b>  | <b>*p=0.01</b> | p=0.22      | p=0.49      |
| <b>Employment</b>       |                |                |                 |                |             |             |
| Less than full time     | 76.10 (10.7)   | 77.7 (11.0)    | 77.8 (16.5)     | 76.8 (16.2)    | 80.5 (17.5) | 69.1 (12.5) |
| Full time               | 65.6 (9.9)     | 68.2 (11.0)    | 63.4 (17.5)     | 61.7 (13.7)    | 67.0 (19.6) | 68.4 (9.5)  |
|                         | <b>*p=0.04</b> | p=0.08         | p=0.09          | <b>*p=0.04</b> | p=0.14      | p=0.90      |
| <b>Age at Diagnosis</b> |                |                |                 |                |             |             |
| 0-4                     | 70.9 (14.1)    | 70.8 (13.6)    | 67.8 (24.1)     | 70.8 (16.0)    | 77.1 (19.6) | 71.3 (16.0) |
| 5-12                    | 69.4 (9.4)     | 74.0 (11.0)    | 70.7 (16.6)     | 64.7 (16.8)    | 67.4 (19.5) | 68.5 (4.8)  |
| 13-17                   | 70.1 (14.1)    | 70.3 (13.1)    | 69.3 (16.0)     | 71.4 (18.7)    | 78.1 (21.3) | 65.3 (12.1) |
|                         | p=0.97         | p=0.84         | p=0.96          | p=0.72         | p=0.55      | p=0.70      |
| <b>Children</b>         |                |                |                 |                |             |             |
| No                      | 70.6 (13.2)    | 71.0 (13.7)    | 70.7 (21.2)     | 68.5 (17.9)    | 71.0 (20.6) | 71.5 (10.8) |
| Yes                     | 69.3 (8.9)     | 73.8 (9.0)     | 67.9 (14.0)     | 67.4 (15.0)    | 75 (18.9)   | 64.9 (9.4)  |
|                         | p=0.81         | p=0.62         | p=0.75          | p=0.90         | p=0.67      | p=0.19      |

\*significance p&lt;0.05

**Table S2.** Barriers to Care survey scores of SCD caregiver participants analyzed by demographic variables

| Variable            | Mean (SD)      |             |                 |              |             |                |
|---------------------|----------------|-------------|-----------------|--------------|-------------|----------------|
|                     | Total          | Skills      | Marginalization | Expectations | Knowledge   | Pragmatics     |
| Age                 |                |             |                 |              |             |                |
| 18-34               | 68.8 (25.5)    | 79.0 (10.3) | 77.9 (16.9)     | 79.2 (15.4)  | 83.0 (16.3) | 62.1 (26.2)    |
| 35+                 | 74.1 (13.9)    | 80.4 (16.5) | 76.3 (22.1)     | 73.3 (21.1)  | 75 (20.6)   | 65.0 (20.0)    |
|                     | p=0.50         | p=0.80      | p=0.85          | p=0.44       | p=0.30      | p=0.75         |
| Sex                 |                |             |                 |              |             |                |
| Male                | 82.4 (12.7)    | 84.4 (13.6) | 88.6 (10.4)     | 79.8 (20.0)  | 81.3 (10.8) | 75.0 (22.7)    |
| Female              | 70.5 (19.9)    | 79.2 (14.2) | 75.5 (20.3)     | 75.3 (19.1)  | 78.0 (19.9) | 62.3 (22.4)    |
|                     | p=0.33         | p=0.56      | p=0.29          | p=0.71       | p=0.79      | p=0.36         |
| Education           |                |             |                 |              |             |                |
| Primary             | 77.7 (8.1)     | 80.7 (10.7) | 81.8 (14.4)     | 81.5 (10.0)  | 74.0 (22.5) | 67.6 (18.2)    |
| Secondary           | 75.6 (14.8)    | 77.6 (17.0) | 78.5 (21.2)     | 75.7 (23.1)  | 79.5 (22.0) | 68.2 (18.4)    |
| College+            | 63.4 (27.1)    | 81.9 (12.9) | 72.0 (21.8)     | 72.2 (18.4)  | 79.9 (13.5) | 55.8 (28.6)    |
|                     | p=0.27         | p=0.78      | p=0.62          | p=0.66       | p=0.82      | p=0.43         |
| Employment          |                |             |                 |              |             |                |
| Less than full time | 68.2 (27.3)    | 78.1 (11.0) | 76.6 (20.2)     | 81.1 (13.5)  | 81.9 (17.3) | 63.5 (29.4)    |
| Full time           | 74.1 (12.8)    | 80.9 (15.8) | 77.3 (20.1)     | 72.5 (21.2)  | 76.2 (20.2) | 63.9 (17.7)    |
|                     | p=0.46         | p=0.64      | p=0.93          | p=0.27       | p=0.47      | p=0.97         |
| Children            |                |             |                 |              |             |                |
| 1-2                 | 66.4 (23.8)    | 75.7 (15.4) | 78.0 (20.3)     | 72.5 (22.4)  | 73.1 (20.3) | 60.2 (24.8)    |
| 3+                  | 77.3 (12.3)    | 83.9 (11.5) | 76.0 (19.9)     | 79.1 (14.5)  | 83.7 (16.6) | 67.3 (55.2)    |
|                     | p=0.16         | p=0.14      | p=0.81          | p=0.38       | p=0.16      | p=0.43         |
| Children with SCD   |                |             |                 |              |             |                |
| 1                   | 69.9 (19.9)    | 78.3 (13.8) | 75.5 (20.1)     | 73.1 (19.0)  | 77.8 (19.0) | 63.4 (22.9)    |
| 2                   | 82.5 (13.5)    | 88.3 (13.6) | 85.2 (17.6)     | 91.1 (6.8)   | 81.3 (21.7) | 66.0 (22.0)    |
|                     | p=0.24         | p=0.19      | p=0.38          | p=0.08       | p=0.75      | p=0.83         |
| Age of Child        |                |             |                 |              |             |                |
| 2-4                 | 51.8 (33.2)    | 73.8 (4.7)  | 70.5 (30.4)     | 74.3 (19.1)  | 80.0 (16.8) | 40.4 (33.9)    |
| 8-12                | 79.8 (10.7)    | 80.7 (15.8) | 84.3 (10.4)     | 79.5 (12.9)  | 82.8 (15.1) | 71.5 (13.0)    |
| 13-17               | 72.4 (10.8)    | 81.9 (15.1) | 71.0 (21.5)     | 71.8 (25.5)  | 71.5 (24.2) | 66.4 (17.6)    |
|                     | <b>*p=0.02</b> | p=0.57      | p=0.23          | p=0.66       | p=0.41      | <b>*p=0.02</b> |
| Age at Diagnosis    |                |             |                 |              |             |                |
| 0-1                 | 73.4 (13.4)    | 82.5 (10.6) | 74.1 (20.9)     | 72.8 (15.2)  | 81.7 (15.8) | 59.4 (18.8)    |
| 2-4                 | 66.4 (30.0)    | 79.3 (16.9) | 81.5 (20.2)     | 75.4 (26.5)  | 71.1 (23.4) | 67.3 (30.5)    |
| 5-13                | 76.6 (11.8)    | 73.8 (17.9) | 77.3 (18.7)     | 84.3 (13.0)  | 81.3 (19.8) | 69.4 (17.6)    |
|                     | p=0.63         | p=0.50      | p=0.72          | p=0.53       | p=0.45      | p=0.62         |

\*significance p<0.05

**Table S3.** ASCQ-ME survey scores of individuals with SCD analyzed by demographic variables

| Variable            | Mean (SD)      |                |            |             |            |
|---------------------|----------------|----------------|------------|-------------|------------|
|                     | Emotional      | Social         | Sleep      | Stiffness   | Pain       |
| Age                 |                |                |            |             |            |
| 18-34               | 47.8 (4.0)     | 52.6 (6.2)     | 52.5 (4.7) | 52.7 (8.2)  | 52.7 (5.9) |
| 35+                 | 47.3 (4.4)     | 44.2 (8.3)     | 52.1 (6.0) | 49.7 (7.7)  | 48.9 (2.3) |
|                     | p=0.80         | <b>*p=0.02</b> | p=0.89     | p=0.44      | p=0.13     |
| Sex                 |                |                |            |             |            |
| Male                | 49.0 (0.63)    | 50.7 (6.3)     | 52.2 (4.3) | 49.4 (3.4)  | 49.1 (3.4) |
| Female              | 47.1 (4.6)     | 49.1 (8.7)     | 52.3 (5.4) | 52.3 (9.0)  | 52.0 (5.6) |
|                     | p=0.40         | p=0.7          | p=0.95     | p=0.49      | p=0.28     |
| Education           |                |                |            |             |            |
| Primary             | 47.5 (2.4)     | 47.4 (9.5)     | 50.3 (5.3) | 47.5 (2.9)  | 47.8 (2.6) |
| Secondary           | 44.9 (3.5)     | 49.8 (5.9)     | 52.0 (4.2) | 53.8 (8.2)  | 50.7 (5.7) |
| College+            | 50.7 (3.3)     | 50.4 (10.1)    | 53.9 (5.9) | 51.4 (9.4)  | 53.8 (4.8) |
|                     | <b>*p=0.01</b> | p=0.84         | p=0.54     | p=0.45      | p=0.17     |
| Employment          |                |                |            |             |            |
| Less than full time | 47.5 (4.2)     | 49.2 (10.8)    | 52.7 (5.9) | 52.7 (6.7)  | 50.7 (5.9) |
| Full time           | 47.7 (4.1)     | 49.7 (5.8)     | 52.1 (4.6) | 50.7 (8.9)  | 51.6 (4.9) |
|                     | p=0.91         | p=0.89         | p=0.79     | p=0.60      | p=0.72     |
| Age at Diagnosis    |                |                |            |             |            |
| 0-4                 | 46.8 (3.6)     | 48.7 (8.9)     | 54.0 (4.6) | 53.5 (6.1)  | 52.2 (6.8) |
| 5-12                | 48.2 (4.5)     | 49.8 (9.4)     | 52.2 (5.4) | 51.4 (7.1)  | 51.1 (5.3) |
| 13-17               | 47.5 (4.4)     | 50.2 (3.5)     | 50.2 (5.4) | 48.9 (12.7) | 50.2 (2.3) |
|                     | p=0.83         | p=0.96         | p=0.54     | p=0.70      | p=0.84     |
| Children            |                |                |            |             |            |
| No                  | 48.3 (4.7)     | 50.1 (9.2)     | 53.3 (5.3) | 51.6 (8.7)  | 51.3 (5.0) |
| Yes                 | 46.7 (2.8)     | 48.7 (6.4)     | 51.1 (4.7) | 51.5 (7.3)  | 51.3 (5.8) |
|                     | p=0.39         | p=0.72         | p=0.36     | p=0.98      | p=1.0      |

\*significance p&lt;0.05

**Table S4.** Correlations of SCD-related Caregiver Burden survey scores with demographic variables

| Variable                 | Total     | n (%)     |           | p Value |
|--------------------------|-----------|-----------|-----------|---------|
|                          |           | No Burden | Burden    |         |
| <b>Age</b>               |           |           |           |         |
| 18-34                    | 11 (42.3) | 4 (28.6)  | 7 (58.3)  | p=0.13  |
| 35+                      | 15 (57.7) | 10 (71.4) | 5 (41.7)  |         |
| <b>Sex</b>               |           |           |           |         |
| Male                     | 3 (11.5)  | 2 (14.3)  | 1 (8.3)   | p=0.64  |
| Female                   | 23 (88.5) | 12 (85.7) | 11 (91.7) |         |
| <b>Education</b>         |           |           |           |         |
| Primary                  | 6 (23.1)  | 2 (14.3)  | 4 (33.3)  | p=0.18  |
| Secondary                | 11 (42.3) | 5 (35.7)  | 6 (50.0)  |         |
| College+                 | 9 (34.6)  | 7 (50.0)  | 2 (16.7)  |         |
| <b>Employment</b>        |           |           |           |         |
| Less than full time      | 10 (38.5) | 4 (26.6)  | 6 (50.0)  | p=0.26  |
| Full time                | 16 (61.5) | 10 (71.4) | 6 (50.0)  |         |
| <b>Children</b>          |           |           |           |         |
| 1-2                      | 13 (50.0) | 7 (50.0)  | 6 (50.0)  | p=1.0   |
| 3+                       | 13 (50.0) | 7 (50.0)  | 6 (50.0)  |         |
| <b>Children with SCD</b> |           |           |           |         |
| 1                        | 22 (84.6) | 11 (78.6) | 11 (91.7) | p=0.36  |
| 2                        | 4 (15.4)  | 3 (21.4)  | 1 (8.3)   |         |
| <b>Age of Child</b>      |           |           |           |         |
| 2-4                      | 5 (19.2)  | 2 (14.3)  | 3 (25.0)  | p=0.59  |
| 8-12                     | 12 (46.2) | 6 (42.9)  | 6 (50.0)  |         |
| 13-17                    | 9 (34.6)  | 6 (42.9)  | 3 (25.0)  |         |
| <b>Age at Diagnosis</b>  |           |           |           |         |
| 0-1                      | 13 (50.0) | 5 (35.7)  | 8 (66.7)  | p=0.07  |
| 2-4                      | 8 (30.8)  | 7 (50.0)  | 1 (8.3)   |         |
| 5-13                     | 5 (19.2)  | 2 (14.3)  | 3 (25.0)  |         |

**Table S5.** Correlations of Barriers to Care survey scores of adults with SCD with genetics of sickle cell disease knowledge questions

| Question                                              | Total       | Skills      | Mean (SD)       |              |                |             |
|-------------------------------------------------------|-------------|-------------|-----------------|--------------|----------------|-------------|
|                                                       |             |             | Marginalization | Expectations | Knowledge      | Pragmatics  |
| Sickle cell disease is a genetic condition.           |             |             |                 |              |                |             |
| Correct                                               | 69.1 (11.9) | 73.8 (11.9) | 67.2 (18.4)     | 67.2 (16.9)  | 68.8 (18.5)    | 68.8 (10.0) |
| Incorrect                                             | 74.0 (6.0)  | 63.5 (6.5)  | 81.8 (12.7)     | 72.6 (14.4)  | 93.8 (6.3)     | 68.5 (15.8) |
|                                                       | p=0.42      | p=0.17      | p=0.21          | p=0.61       | <b>*p=0.04</b> | p=0.97      |
| Children can catch sickle cell disease later in life. |             |             |                 |              |                |             |
| Correct                                               | 72.6 (11.2) | 72.8 (13.0) | 72.9 (13.6)     | 71.4 (16.8)  | 76.4 (18.2)    | 70.5 (11.8) |
| Incorrect                                             | 64.5 (10.3) | 70.8 (9.2)  | 62.1 (25.4)     | 60.7 (13.6)  | 64.6 (21.2)    | 64.8 (6.0)  |
|                                                       | p=0.16      | p=0.74      | p=0.24          | p=0.19       | p=0.23         | p=0.28      |

\*significance p<0.05

**Table S6.** Genetics of sickle cell disease knowledge questions analyzed by demographic variables of caregiver participants

| Variable                 | Sickle cell disease is a genetic condition. |           |           |              | Children can catch sickle cell disease later in life. |           |           |         |
|--------------------------|---------------------------------------------|-----------|-----------|--------------|-------------------------------------------------------|-----------|-----------|---------|
|                          | Total                                       | Correct   | Incorrect | p Value      | Total                                                 | Correct   | Incorrect | p Value |
| <b>Age</b>               |                                             |           |           |              |                                                       |           |           |         |
| 18-34                    | 11 (42.3)                                   | 10 (45.5) | 1 (25.0)  | 0.45         | 11 (42.3)                                             | 9 (50.0)  | 2 (25.0)  | 0.23    |
| 35+                      | 15 (57.7)                                   | 12 (54.6) | 3 (75.0)  |              | 15 (57.7)                                             | 9 (50.0)  | 6 (75.0)  |         |
| <b>Sex</b>               |                                             |           |           |              |                                                       |           |           |         |
| Male                     | 3 (11.5)                                    | 3 (13.6)  | 0 (0.0)   | 0.43         | 3 (11.5)                                              | 2 (11.1)  | 1 (12.5)  | 0.92    |
| Female                   | 23 (88.5)                                   | 19 (86.4) | 4 (100.0) |              | 23 (88.5)                                             | 16 (88.9) | 7 (87.5)  |         |
| <b>Education</b>         |                                             |           |           |              |                                                       |           |           |         |
| Primary                  | 6 (23.1)                                    | 5 (22.7)  | 1 (25.0)  | 0.91         | 6 (23.1)                                              | 3 (16.7)  | 3 (37.5)  | 0.39    |
| Secondary                | 11 (42.3)                                   | 9 (40.9)  | 2 (50.0)  |              | 11 (42.3)                                             | 9 (50.0)  | 2 (25.0)  |         |
| College+                 | 9 (34.6)                                    | 8 (36.4)  | 1 (25.0)  |              | 9 (34.6)                                              | 6 (33.3)  | 3 (37.5)  |         |
| <b>Employment</b>        |                                             |           |           |              |                                                       |           |           |         |
| Less than full time      | 10 (38.5)                                   | 8 (36.4)  | 2 (50.0)  | 0.61         | 10 (38.5)                                             | 7 (38.9)  | 3 (37.5)  | 0.95    |
| Full time                | 16 (61.5)                                   | 14 (63.6) | 2 (50.0)  |              | 16 (61.5)                                             | 11 (61.1) | 5 (62.5)  |         |
| <b>Children</b>          |                                             |           |           |              |                                                       |           |           |         |
| 1-2                      | 13 (50.0)                                   | 9 (40.9)  | 4 (100.0) | <b>*0.03</b> | 13 (50.0)                                             | 7 (38.9)  | 6 (75.0)  | 0.09    |
| 3+                       | 13 (50.0)                                   | 13 (59.1) | 0 (0.0)   |              | 13 (50.0)                                             | 11 (61.1) | 2 (25.0)  |         |
| <b>Children with SCD</b> |                                             |           |           |              |                                                       |           |           |         |
| 1                        | 22 (84.6)                                   | 18 (81.8) | 4 (100.0) | 0.35         | 22 (84.6)                                             | 15 (83.3) | 7 (87.5)  | 0.79    |
| 2                        | 4 (15.4)                                    | 4 (18.2)  | 0 (0.0)   |              | 4 (15.4)                                              | 3 (16.7)  | 1 (12.5)  |         |
| <b>Age of Child</b>      |                                             |           |           |              |                                                       |           |           |         |
| 2-4                      | 5 (19.2)                                    | 5 (22.7)  | 0 (0.0)   | 0.39         | 5 (19.2)                                              | 4 (22.2)  | 1 (12.5)  | 0.85    |
| 5-12                     | 12 (46.2)                                   | 9 (40.9)  | 3 (75.0)  |              | 12 (46.2)                                             | 8 (44.4)  | 4 (50.0)  |         |
| 13-17                    | 9 (34.6)                                    | 8 (36.4)  | 1 (25.0)  |              | 9 (34.6)                                              | 6 (33.3)  | 3 (37.5)  |         |
| <b>Age at Diagnosis</b>  |                                             |           |           |              |                                                       |           |           |         |
| 0-1                      | 13 (50.0)                                   | 12 (54.6) | 1 (25.0)  | 0.54         | 13 (50.0)                                             | 11 (61.1) | 2 (25.0)  | 0.06    |
| 2-4                      | 8 (30.8)                                    | 6 (27.3)  | 2 (50.0)  |              | 8 (30.8)                                              | 3 (16.7)  | 5 (62.5)  |         |
| 5-12                     | 5 (19.2)                                    | 4 (18.2)  | 1 (25.0)  |              | 5 (19.2)                                              | 4 (22.2)  | 1 (12.5)  |         |

\*significance p<0.05

**Table S7.** Barriers to Care survey scores of caregiver participants analyzed by genetics of sickle cell disease knowledge

| Question                                              | Total       | Skills          | Mean (SD)       |              |             |             |
|-------------------------------------------------------|-------------|-----------------|-----------------|--------------|-------------|-------------|
|                                                       |             |                 | Marginalization | Expectations | Knowledge   | Pragmatics  |
| Sickle cell disease is a genetic condition.           |             |                 |                 |              |             |             |
| Correct                                               | 72.3 (21.1) | 83.2 (11.4)     | 76.9 (21.3)     | 76.8 (20.3)  | 79.3 (19.4) | 63.7 (24.2) |
| Incorrect                                             | 69.5 (2.7)  | 60.9 (12.6)     | 77.8 (8.8)      | 70.5 (3.4)   | 73.4 (18.0) | 63.9 (6.8)  |
|                                                       | p=0.80      | <b>*p=0.002</b> | p=0.93          | p=0.55       | p=0.58      | p=0.99      |
| Children can catch sickle cell disease later in life. |             |                 |                 |              |             |             |
| Correct                                               | 74.5 (14.1) | 83.0 (11.8)     | 72.9 (21.4)     | 73.0 (20.0)  | 80.2 (18.8) | 66.8 (19.6) |
| Incorrect                                             | 65.8 (28.2) | 72.7 (16.7)     | 86.4 (11.5)     | 82.1 (15.0)  | 74.2 (19.9) | 56.8 (27.7) |
|                                                       | p=0.30      | p=0.08          | p=0.11          | p=0.26       | p=0.47      | p=0.30      |

\*significance p<0.05
